# Supplementary material for: Autoinhibition and regulation by phosphoinositides of ATP8B1, a human lipid flippase associated with intrahepatic cholestatic disorders
Source: eLife journal article supplement (doi:10.7554/elife.75272), 2022-04-13
Supplement: supp [file elife-75272-supp-v1.zip]

Figure 5 – figure supplement 1C – source data

|  | Group A | Group B                  |
|-----------------------------------------------------------------------------------|---------|--------------------------|
|                                                                                   | none    | 70 $\mu$ M C-ter peptide |
|                                                                                   |         |                          |
| 1                                                                                 | 0.064   | 0.068                    |
| 2                                                                                 | 0.069   | 0.063                    |
| 3                                                                                 | 0.065   | 0.064                    |
