# Supplementary material for: Autoinhibition and regulation by phosphoinositides of ATP8B1, a human lipid flippase associated with intrahepatic cholestatic disorders
Source: eLife journal article supplement (doi:10.7554/elife.75272), 2022-04-13
Supplement: supp [file elife-75272-supp-v1.zip]

Figure 5C – fit C-ter peptide

| Nonlin fit |                                                                 | A                        |
|------------|-----------------------------------------------------------------|--------------------------|
|            |                                                                 | dC E1174 (C-ter)         |
|            |                                                                 | Y                        |
| 1          | log(inhibitor) vs. response -- Variable slope (four parameters) |                          |
| 2          | Best-fit values                                                 |                          |
| 3          | Bottom                                                          | 15.76                    |
| 4          | Top                                                             | 95.62                    |
| 5          | LogIC50                                                         | -7.091                   |
| 6          | HillSlope                                                       | -0.9289                  |
| 7          | IC50                                                            | 8.116e-008               |
| 8          | Span                                                            | 79.86                    |
| 9          | Std. Error                                                      |                          |
| 10         | Bottom                                                          | 2.894                    |
| 11         | Top                                                             | 2.804                    |
| 12         | LogIC50                                                         | 0.06927                  |
| 13         | HillSlope                                                       | 0.1349                   |
| 14         | Span                                                            | 4.709                    |
| 15         | 95% Confidence Intervals                                        |                          |
| 16         | Bottom                                                          | 9.848 to 21.67           |
| 17         | Top                                                             | 89.90 to 101.3           |
| 18         | LogIC50                                                         | -7.232 to -6.949         |
| 19         | HillSlope                                                       | -1.204 to -0.6534        |
| 20         | IC50                                                            | 5.860e-008 to 1.124e-007 |
| 21         | Span                                                            | 70.25 to 89.48           |
| 22         | Goodness of Fit                                                 |                          |
| 23         | Degrees of Freedom                                              | 30                       |
| 24         | R square                                                        | 0.9697                   |
| 25         | Absolute Sum of Squares                                         | 963.6                    |
| 26         | Sy,x                                                            | 5.667                    |
| 27         |                                                                 |                          |
| 28         | Number of points                                                |                          |
| 29         | Analyzed                                                        | 34                       |

Figure 5C – fit phosphorylated C-ter peptide

| Nonlin fit |                                                          | A                        |
|------------|----------------------------------------------------------|--------------------------|
|            |                                                          | dC E1174 (Phos C-ter)    |
|            |                                                          | Y                        |
| 1          | log(inhibitor) vs. normalized response -- Variable slope |                          |
| 2          | Best-fit values                                          |                          |
| 3          | LogIC50                                                  | -5.708                   |
| 4          | HillSlope                                                | -0.2911                  |
| 5          | IC50                                                     | 1.957e-006               |
| 6          | Std. Error                                               |                          |
| 7          | LogIC50                                                  | 0.07221                  |
| 8          | HillSlope                                                | 0.01743                  |
| 9          | 95% Confidence Intervals                                 |                          |
| 10         | LogIC50                                                  | -5.854 to -5.563         |
| 11         | HillSlope                                                | -0.3262 to -0.2560       |
| 12         | IC50                                                     | 1.400e-006 to 2.735e-006 |
| 13         | Goodness of Fit                                          |                          |
| 14         | Degrees of Freedom                                       | 45                       |
| 15         | R square                                                 | 0.9107                   |
| 16         | Absolute Sum of Squares                                  | 1859                     |
| 17         | Sy.x                                                     | 6.428                    |
| 18         |                                                          |                          |
| 19         | Number of points                                         |                          |
| 20         | Analyzed                                                 | 47                       |
