# Supplementary material for: Autoinhibition and regulation by phosphoinositides of ATP8B1, a human lipid flippase associated with intrahepatic cholestatic disorders
Source: eLife journal article supplement (doi:10.7554/elife.75272), 2022-04-13
Supplement: supp [file elife-75272-supp-v1.zip]

Figure 6 – figure supplement 2B – source data

|    |   | X      | Group A        |        |      |      | Group B        |      |      |      |
|----|---|--------|----------------|--------|------|------|----------------|------|------|------|
|    |   | Ve, mL | Protein, pmole |        |      |      | 14C-DDM, pmole |      |      |      |
|    |   | X      | A:Y1           | A:Y2   | A:Y3 | A:Y4 | B:Y1           | B:Y2 | B:Y3 | B:Y4 |
| 1  | T | 5.25   | 33.30          | 29.00  |      |      | 29263.0        |      |      |      |
| 2  | T | 5.50   | 13.60          | 24.70  |      |      | 20455.0        |      |      |      |
| 3  | T | 5.75   | 25.90          | 37.00  |      |      | 20057.0        |      |      |      |
| 4  | T | 6.00   | 31.50          | 38.90  |      |      | 8531.0         |      |      |      |
| 5  | T | 6.25   | 30.80          | 25.30  |      |      | 8462.0         |      |      |      |
| 6  | T | 6.50   | 64.20          | 111.10 |      |      | 28675.0        |      |      |      |
| 7  | T | 6.75   | 121.60         | 98.80  |      |      | 23639.0        |      |      |      |
| 8  | T | 7.00   | 82.10          | 54.90  |      |      | 18793.0        |      |      |      |
| 9  | T | 7.25   | 40.10          | 33.30  |      |      | 7199.0         |      |      |      |
| 10 | T | 7.50   | 22.80          | 29.00  |      |      | 9016.0         |      |      |      |
| 11 | T | 7.75   | 24.70          | 16.10  |      |      | 1696.0         |      |      |      |
| 12 | T | 8.00   | 6.20           | 21.00  |      |      | 0.0            |      |      |      |
| 13 | T | 8.25   | 6.80           | 0.00   |      |      | 3634.0         |      |      |      |
| 14 | T | 8.50   | 0.00           | 0.60   |      |      | 10383.0        |      |      |      |
| 15 | T | 8.75   | 9.90           | 7.40   |      |      | 11871.0        |      |      |      |
| 16 | T | 9.00   | 19.10          | 0.00   |      |      | 118782.0       |      |      |      |
| 17 | T | 9.25   | 13.00          | 3.70   |      |      | 123611.0       |      |      |      |
| 18 | T | 9.50   | 6.80           | 0.00   |      |      | 32257.0        |      |      |      |
| 19 | T | 9.75   | 6.20           | 1.30   |      |      | 3755.0         |      |      |      |
| 20 | T | 10.00  | 19.10          | 17.30  |      |      | -1782.0        |      |      |      |
