# Supplementary material for: Autoinhibition and regulation by phosphoinositides of ATP8B1, a human lipid flippase associated with intrahepatic cholestatic disorders
Source: eLife journal article supplement (doi:10.7554/elife.75272), 2022-04-13
Supplement: supp [file elife-75272-supp-v1.zip]

# Figure 5D – source data

| Table format:<br>Grouped |    | Group A                          |         |    | Group B                      |         |    |
|--------------------------|----|----------------------------------|---------|----|------------------------------|---------|----|
|                          |    | non phosphorylated C-ter peptide |         |    | phosphorylated C-ter peptide |         |    |
|                          | ⊗  | Mean                             | SD      | N  | Mean                         | SD      | N  |
| 1                        | ΔC | 0.08100                          | 0.01400 | 34 | 1.96000                      | 0.35000 | 47 |

| Table format:<br>Grouped |     | Group A                          |         |    | Group B                      |           |    |
|--------------------------|-----|----------------------------------|---------|----|------------------------------|-----------|----|
|                          |     | non phosphorylated C-ter peptide |         |    | phosphorylated C-ter peptide |           |    |
|                          | ⊗   | Mean                             | SD      | N  | Mean                         | SD        | N  |
| 1                        | ΔNC | 22.10000                         | 1.20000 | 33 | 377.40000                    | 227.00000 | 35 |
