# Supplementary material for: Autoinhibition and regulation by phosphoinositides of ATP8B1, a human lipid flippase associated with intrahepatic cholestatic disorders
Source: eLife journal article supplement (doi:10.7554/elife.75272), 2022-04-13
Supplement: supp [file elife-75272-supp-v1.zip]

Figure 6 – figure supplement 1 – source data

| Table format:<br>XY |       | X      | Group A   |          |          |          | Group B      |          |          |          | Group C          |          |          |      |
|---------------------|-------|--------|-----------|----------|----------|----------|--------------|----------|----------|----------|------------------|----------|----------|------|
|                     |       | 1/[S]  | 1/v (P4P) |          |          |          | 1/v (P4,5P2) |          |          |          | 1/v (P13,4,5)/P3 |          |          |      |
|                     | ⊗     | X      | A:Y1      | A:Y2     | A:Y3     | A:Y4     | B:Y1         | B:Y2     | B:Y3     | B:Y4     | C:Y1             | C:Y2     | C:Y3     | C:Y4 |
| 1                   | Title | 43.2   | 0.185185  | 0.135135 | 0.156250 | 0.163934 |              |          |          |          |                  |          |          |      |
| 2                   | Title | 59.8   | 0.256410  | 0.192308 | 0.200000 | 0.222222 |              |          |          |          |                  |          |          |      |
| 3                   | Title | 76.5   | 0.277778  | 0.227273 | 0.270270 | 0.270270 |              |          |          |          |                  |          |          |      |
| 4                   | Title | 93.2   | 0.333333  | 0.312500 | 0.322581 | 0.344828 |              |          |          |          |                  |          |          |      |
| 5                   | Title | 126.6  | 0.357143  | 0.344828 | 0.454546 | 0.384615 |              |          |          |          |                  |          |          |      |
| 6                   | Title | 159.9  | 0.500000  | 0.454546 | 0.476191 | 0.500000 |              |          |          |          |                  |          |          |      |
| 7                   | Title | 193.3  | 0.526316  | 0.666667 | 0.714286 | 0.555556 |              |          |          |          |                  |          |          |      |
| 8                   | Title | 260.0  | 0.555556  | 0.666667 | 0.769231 | 0.666667 |              |          |          |          |                  |          |          |      |
| 9                   | Title | 393.4  | 0.909091  | 0.714286 | 1.250000 | 1.250000 |              |          |          |          |                  |          |          |      |
| 10                  | Title | 42.6   |           |          |          |          |              | 0.125000 | 0.116279 | 0.112360 |                  |          |          |      |
| 11                  | Title | 59.1   |           |          |          |          |              | 0.138889 | 0.142857 |          |                  |          |          |      |
| 12                  | Title | 75.6   |           |          |          |          |              | 0.185185 | 0.166667 | 0.156250 |                  |          |          |      |
| 13                  | Title | 92.0   |           |          |          |          |              | 0.217391 | 0.181818 |          |                  |          |          |      |
| 14                  | Title | 124.9  |           |          |          |          |              | 0.270270 | 0.232558 | 0.188679 |                  |          |          |      |
| 15                  | Title | 157.8  |           |          |          |          |              | 0.312500 | 0.243902 |          |                  |          |          |      |
| 16                  | Title | 190.8  |           |          |          |          |              | 0.357143 | 0.256410 | 0.263158 |                  |          |          |      |
| 17                  | Title | 256.6  |           |          |          |          |              | 0.454546 | 0.312500 | 0.312500 |                  |          |          |      |
| 18                  | Title | 388.2  |           |          |          |          |              | 0.555556 | 0.769231 | 0.384615 |                  |          |          |      |
| 19                  | Title | 45.6   |           |          |          |          | 0.102041     |          |          |          |                  |          |          |      |
| 20                  | Title | 64.3   |           |          |          |          | 0.125000     |          |          |          |                  |          |          |      |
| 21                  | Title | 83.1   |           |          |          |          | 0.140845     |          |          |          |                  |          |          |      |
| 22                  | Title | 101.8  |           |          |          |          | 0.166667     |          |          |          |                  |          |          |      |
| 23                  | Title | 139.3  |           |          |          |          | 0.208333     |          |          |          |                  |          |          |      |
| 24                  | Title | 176.8  |           |          |          |          | 0.243902     |          |          |          |                  |          |          |      |
| 25                  | Title | 214.3  |           |          |          |          | 0.277778     |          |          |          |                  |          |          |      |
| 26                  | Title | 289.3  |           |          |          |          | 0.357143     |          |          |          |                  |          |          |      |
| 27                  | Title | 439.3  |           |          |          |          | 0.476191     |          |          |          |                  |          |          |      |
| 28                  | Title | 42.2   |           |          |          |          |              |          |          |          | 0.111111         |          |          |      |
| 29                  | Title | 58.5   |           |          |          |          |              |          |          |          | 0.113636         |          |          |      |
| 30                  | Title | 74.9   |           |          |          |          |              |          |          |          | 0.114943         |          |          |      |
| 31                  | Title | 91.2   |           |          |          |          |              |          |          |          | 0.116279         |          |          |      |
| 32                  | Title | 123.8  |           |          |          |          |              |          |          |          | 0.120482         |          |          |      |
| 33                  | Title | 156.4  |           |          |          |          |              |          |          |          | 0.121951         |          |          |      |
| 34                  | Title | 189.1  |           |          |          |          |              |          |          |          | 0.126582         |          |          |      |
| 35                  | Title | 254.3  |           |          |          |          |              |          |          |          | 0.131579         |          |          |      |
| 36                  | Title | 42.2   |           |          |          |          |              |          |          |          |                  | 0.119048 | 0.103093 |      |
| 37                  | Title | 74.9   |           |          |          |          |              |          |          |          |                  | 0.114943 | 0.117647 |      |
| 38                  | Title | 123.8  |           |          |          |          |              |          |          |          |                  | 0.125000 | 0.121951 |      |
| 39                  | Title | 189.1  |           |          |          |          |              |          |          |          |                  | 0.140845 | 0.133333 |      |
| 40                  | Title | 254.3  |           |          |          |          |              |          |          |          |                  | 0.151515 | 0.140845 |      |
| 41                  | Title | 384.8  |           |          |          |          |              |          |          |          |                  | 0.172414 | 0.163934 |      |
| 42                  | Title | 580.6  |           |          |          |          |              |          |          |          |                  | 0.204082 | 0.200000 |      |
| 43                  | Title | 841.6  |           |          |          |          |              |          |          |          |                  | 0.227273 | 0.217391 |      |
| 44                  | Title | 1102.6 |           |          |          |          |              |          |          |          |                  | 0.263158 | 0.256410 |      |

Figure 6 – figure supplement 1 – fit – PI4P

| Simple linear regression |                                  | A                        |
|--------------------------|----------------------------------|--------------------------|
|                          |                                  | 1/v (PI4P)               |
|                          |                                  | Y                        |
| 1                        | Best-fit values                  |                          |
| 2                        | Slope                            | 0.002420 ± 0.0001483     |
| 3                        | Y-intercept when X=0.0           | 0.08272 ± 0.02803        |
| 4                        | X-intercept when Y=0.0           | -34.18                   |
| 5                        | 1/slope                          | 413.2                    |
| 6                        | 95% Confidence Intervals         |                          |
| 7                        | Slope                            | 0.002118 to 0.002722     |
| 8                        | Y-intercept when X=0.0           | 0.02572 to 0.1397        |
| 9                        | X-intercept when Y=0.0           | -64.75 to -9.628         |
| 10                       | Goodness of Fit                  |                          |
| 11                       | R square                         | 0.8867                   |
| 12                       | Sy.x                             | 0.09461                  |
| 13                       | Is slope significantly non-zero? |                          |
| 14                       | F                                | 266.1                    |
| 15                       | DFn, DFd                         | 1.000, 34.00             |
| 16                       | P value                          | < 0.0001                 |
| 17                       | Deviation from zero?             | Significant              |
| 18                       | Data                             |                          |
| 19                       | Number of X values               | 9                        |
| 20                       | Maximum number of Y replicates   | 4                        |
| 21                       | Total number of values           | 36                       |
| 22                       | Number of missing values         | 140                      |
| 23                       |                                  |                          |
| 24                       | Equation                         | Y = 0.002420*X + 0.08272 |

Figure 6 – figure supplement 1 – fit – PI(4,5)P2

| Simple linear regression |                                  | A                        |
|--------------------------|----------------------------------|--------------------------|
|                          |                                  | 1/v (PI4,5P2)            |
|                          |                                  | Y                        |
| 1                        | Best-fit values                  |                          |
| 2                        | Slope                            | 0.001146 ± 0.0001008     |
| 3                        | Y-intercept when X=0.0           | 0.07146 ± 0.02000        |
| 4                        | X-intercept when Y=0.0           | -62.37                   |
| 5                        | 1/slope                          | 872.8                    |
| 6                        | 95% Confidence Intervals         |                          |
| 7                        | Slope                            | 0.0009402 to 0.001351    |
| 8                        | Y-intercept when X=0.0           | 0.03067 to 0.1123        |
| 9                        | X-intercept when Y=0.0           | -116.5 to -23.25         |
| 10                       | Goodness of Fit                  |                          |
| 11                       | R square                         | 0.8065                   |
| 12                       | Sy.x                             | 0.06474                  |
| 13                       | Is slope significantly non-zero? |                          |
| 14                       | F                                | 129.2                    |
| 15                       | DFn, DFd                         | 1.000, 31.00             |
| 16                       | P value                          | < 0.0001                 |
| 17                       | Deviation from zero?             | Significant              |
| 18                       | Data                             |                          |
| 19                       | Number of X values               | 18                       |
| 20                       | Maximum number of Y replicates   | 3                        |
| 21                       | Total number of values           | 33                       |
| 22                       | Number of missing values         | 143                      |
| 23                       |                                  |                          |
| 24                       | Equation                         | Y = 0.001146*X + 0.07146 |

Figure 6 – figure supplement 1 – fit – PI(3,4,5)P3

| Simple linear regression |                                  | A                        |
|--------------------------|----------------------------------|--------------------------|
|                          |                                  | 1/v (PI3,4,5)P3          |
|                          |                                  | Y                        |
| 1                        | Best-fit values                  |                          |
| 2                        | Slope                            | 0.0001436 ± 4.204e-006   |
| 3                        | Y-intercept when X=0.0           | 0.1060 ± 0.001884        |
| 4                        | X-intercept when Y=0.0           | -738.2                   |
| 5                        | 1/slope                          | 6966                     |
| 6                        | 95% Confidence Intervals         |                          |
| 7                        | Slope                            | 0.0001349 to 0.0001522   |
| 8                        | Y-intercept when X=0.0           | 0.1021 to 0.1099         |
| 9                        | X-intercept when Y=0.0           | -808.8 to -675.4         |
| 10                       | Goodness of Fit                  |                          |
| 11                       | R square                         | 0.9798                   |
| 12                       | Sy.x                             | 0.006845                 |
| 13                       | Is slope significantly non-zero? |                          |
| 14                       | F                                | 1166                     |
| 15                       | DFn, DFd                         | 1.000, 24.00             |
| 16                       | P value                          | < 0.0001                 |
| 17                       | Deviation from zero?             | Significant              |
| 18                       | Data                             |                          |
| 19                       | Number of X values               | 17                       |
| 20                       | Maximum number of Y replicates   | 2                        |
| 21                       | Total number of values           | 26                       |
| 22                       | Number of missing values         | 150                      |
| 23                       |                                  |                          |
| 24                       | Equation                         | Y = 0.0001436*X + 0.1060 |
