# Supplementary material for: Autoinhibition and regulation by phosphoinositides of ATP8B1, a human lipid flippase associated with intrahepatic cholestatic disorders
Source: eLife journal article supplement (doi:10.7554/elife.75272), 2022-04-13
Supplement: supp [file elife-75272-supp-v1.zip]

Figure 4 – figure supplement 4A – source data

|   |      | X           | Group A    |            |           |
|---|------|-------------|------------|------------|-----------|
|   |      | log[BeF], M | Data Set-A |            |           |
|   | ⊗    | X           | A:Y1       | A:Y2       | A:Y3      |
| 1 | Titl | -6.300000   | 103.021100 | 104.717000 | 96.530790 |
| 2 | Titl | -6.000000   | 102.014100 | 100.943400 | 89.592370 |
| 3 | Titl | -5.300000   | 96.978850  | 102.830200 | 93.061580 |
| 4 | Titl | -5.000000   | 107.049300 | 98.113200  | 93.061580 |
| 5 | Titl | -4.700000   | 100.000000 | 74.528310  | 87.857770 |
| 6 | Titl | -4.300000   | 52.870090  | 45.283020  | 43.625320 |
| 7 | Titl | -4.000000   | 7.754280   | 9.433962   | 8.065915  |
| 8 | Titl | -3.320000   | -5.236657  | -0.943396  | 5.464007  |
| 9 | Titl | -3.020000   | -2.819738  | -3.301887  | -8.846487 |

Figure 4 – figure supplement 4A – fit

| Nonlin fit<br>Table of results |                                                                        | A                        |
|--------------------------------|------------------------------------------------------------------------|--------------------------|
|                                |                                                                        | Data Set-A               |
|                                |                                                                        | Y                        |
| 1                              | <b>log(inhibitor) vs. response -- Variable slope (four parameters)</b> |                          |
| 2                              | <b>Best-fit values</b>                                                 |                          |
| 3                              | Bottom                                                                 | -3.284                   |
| 4                              | Top                                                                    | 99.05                    |
| 5                              | LogIC50                                                                | -4.314                   |
| 6                              | HillSlope                                                              | -2.599                   |
| 7                              | IC50                                                                   | 4.855e-005               |
| 8                              | Span                                                                   | 102.3                    |
| 9                              | <b>95% CI (profile likelihood)</b>                                     |                          |
| 10                             | Bottom                                                                 | -8.399 to 1.698          |
| 11                             | Top                                                                    | 95.29 to 103.0           |
| 12                             | LogIC50                                                                | -4.367 to -4.265         |
| 13                             | HillSlope                                                              | -3.686 to -1.994         |
| 14                             | IC50                                                                   | 4.291e-005 to 5.434e-005 |
| 15                             | <b>Goodness of Fit</b>                                                 |                          |
| 16                             | Degrees of Freedom                                                     | 23                       |
| 17                             | R squared                                                              | 0.9842                   |
| 18                             | Sum of Squares                                                         | 842.3                    |
| 19                             | Sy.x                                                                   | 6.051                    |
| 20                             |                                                                        |                          |
| 21                             | <b>Number of points</b>                                                |                          |
| 22                             | # of X values                                                          | 27                       |
| 23                             | # Y values analyzed                                                    | 27                       |

Figure 4 – figure supplement 4B – source data

|   |       | X           | Group A           |           |          |
|---|-------|-------------|-------------------|-----------|----------|
|   |       | ATP         | specific activity |           |          |
|   | ⊗     | X           | A:Y1              | A:Y2      | A:Y3     |
| 1 | Title | 0.000000    | -0.026916         | -0.001737 | 0.018234 |
| 2 | Title | 0.999001    | -0.000868         | 0.075539  | 0.048623 |
| 3 | Title | 4.975124    | 0.078144          | 0.059910  | 0.125898 |
| 4 | Title | 19.870840   | 0.200569          | 0.254402  | 0.244851 |
| 5 | Title | 49.529470   | 0.401138          | 0.399402  | 0.377695 |
| 6 | Title | 98.570720   | 0.505330          | 0.500121  | 0.499252 |
| 7 | Title | 491.776400  | 0.636438          | 0.699822  | 0.685061 |
| 8 | Title | 980.873000  | 0.685929          | 0.738894  | 0.738894 |
| 9 | Title | 4799.744000 | 0.743235          | 0.682456  | 0.707636 |

Figure 4 – figure supplement 4B – fit

| Nonlin fit       |                            | A                 |
|------------------|----------------------------|-------------------|
| Table of results |                            | specific activity |
|                  |                            | Y                 |
| 1                | <b>Michaelis-Menten</b>    |                   |
| 2                | <b>Best-fit values</b>     |                   |
| 3                | Vmax                       | 0.7316            |
| 4                | Km                         | 42.47             |
| 5                | <b>Std. Error</b>          |                   |
| 6                | Vmax                       | 0.01035           |
| 7                | Km                         | 2.784             |
| 8                | <b>95% CI (asymptotic)</b> |                   |
| 9                | Vmax                       | 0.7102 to 0.7529  |
| 10               | Km                         | 36.73 to 48.20    |
| 11               | <b>Goodness of Fit</b>     |                   |
| 12               | Degrees of Freedom         | 25                |
| 13               | R squared                  | 0.9912            |
| 14               | Sum of Squares             | 0.01857           |
| 15               | Sy.x                       | 0.02725           |
| 16               | <b>Constraints</b>         |                   |
| 17               | Km                         | Km > 0            |
| 18               |                            |                   |
| 19               | <b>Number of points</b>    |                   |
| 20               | # of X values              | 27                |
| 21               | # Y values analyzed        | 27                |
