# Supplementary material for: Autoinhibition and regulation by phosphoinositides of ATP8B1, a human lipid flippase associated with intrahepatic cholestatic disorders
Source: eLife journal article supplement (doi:10.7554/elife.75272), 2022-04-13
Supplement: supp [file elife-75272-supp-v1.zip]

# Figure 6C – source data

| Table format:<br>XY |       | X                   | Group A         |       |       |       | Group B              |       |       |       | Group C                |       |       |      |
|---------------------|-------|---------------------|-----------------|-------|-------|-------|----------------------|-------|-------|-------|------------------------|-------|-------|------|
|                     | ⊗     | PIP/DDM (mole/mole) | PI4P (μmol/min) |       |       |       | PI(4,5)P2 (μmol/min) |       |       |       | PI(3,4,5)P3 (μmol/min) |       |       |      |
|                     |       | X                   | A:Y1            | A:Y2  | A:Y3  | A:Y4  | B:Y1                 | B:Y2  | B:Y3  | B:Y4  | C:Y1                   | C:Y2  | C:Y3  | C:Y4 |
| 1                   | Title | 0.0000              | 0.0             | 0.0   | 0.0   | 0.0   |                      |       |       |       |                        |       |       |      |
| 2                   | Title | 0.0232              | 94.1            | 128.9 | 111.5 | 106.3 |                      |       |       |       |                        |       |       |      |
| 3                   | Title | 0.0170              | 67.9            | 90.6  | 87.1  | 78.4  |                      |       |       |       |                        |       |       |      |
| 4                   | Title | 0.0130              | 62.7            | 76.6  | 64.5  | 64.5  |                      |       |       |       |                        |       |       |      |
| 5                   | Title | 0.0110              | 52.3            | 55.7  | 54.0  | 50.5  |                      |       |       |       |                        |       |       |      |
| 6                   | Title | 0.0080              | 48.8            | 50.5  | 38.3  | 45.3  |                      |       |       |       |                        |       |       |      |
| 7                   | Title | 0.0060              | 34.8            | 38.3  | 36.6  | 34.8  |                      |       |       |       |                        |       |       |      |
| 8                   | Title | 0.0050              | 33.1            | 26.1  | 24.4  | 31.4  |                      |       |       |       |                        |       |       |      |
| 9                   | Title | 0.0040              | 31.4            | 26.1  | 22.6  | 26.1  |                      |       |       |       |                        |       |       |      |
| 10                  | Title | 0.0030              | 19.2            | 24.4  | 13.9  | 13.9  |                      |       |       |       |                        |       |       |      |
| 11                  | Title | 0.0235              |                 |       |       |       |                      | 139.4 | 149.8 | 155.0 |                        |       |       |      |
| 12                  | Title | 0.0170              |                 |       |       |       |                      | 125.4 | 121.9 |       |                        |       |       |      |
| 13                  | Title | 0.0130              |                 |       |       |       |                      | 94.1  | 104.5 | 111.5 |                        |       |       |      |
| 14                  | Title | 0.0110              |                 |       |       |       |                      | 80.1  | 95.8  |       |                        |       |       |      |
| 15                  | Title | 0.0080              |                 |       |       |       |                      | 64.5  | 74.9  | 92.3  |                        |       |       |      |
| 16                  | Title | 0.0060              |                 |       |       |       | 71.4                 | 55.7  | 71.4  |       |                        |       |       |      |
| 17                  | Title | 0.0050              |                 |       |       |       | 62.7                 | 48.8  | 67.9  | 66.2  |                        |       |       |      |
| 18                  | Title | 0.0040              |                 |       |       |       |                      | 38.3  | 55.7  | 55.7  |                        |       |       |      |
| 19                  | Title | 0.0030              |                 |       |       |       | 48.8                 | 31.4  | 22.6  | 45.3  |                        |       |       |      |
| 20                  | Title | 0.0219              |                 |       |       |       | 170.7                |       |       |       |                        |       |       |      |
| 21                  | Title | 0.0160              |                 |       |       |       | 139.4                |       |       |       |                        |       |       |      |
| 22                  | Title | 0.0120              |                 |       |       |       | 123.7                |       |       |       |                        |       |       |      |
| 23                  | Title | 0.0100              |                 |       |       |       | 104.5                |       |       |       |                        |       |       |      |
| 24                  | Title | 0.0070              |                 |       |       |       | 83.6                 |       |       |       |                        |       |       |      |
| 25                  | Title | 0.0020              |                 |       |       |       | 36.6                 |       |       |       |                        |       |       |      |
| 26                  | Title | 0.0237              |                 |       |       |       |                      |       |       |       | 156.8                  | 146.3 | 169.0 |      |
| 27                  | Title | 0.0170              |                 |       |       |       |                      |       |       |       | 153.3                  |       |       |      |
| 28                  | Title | 0.0130              |                 |       |       |       |                      |       |       |       | 151.5                  | 151.5 | 148.1 |      |
| 29                  | Title | 0.0110              |                 |       |       |       |                      |       |       |       | 149.8                  |       |       |      |
| 30                  | Title | 0.0080              |                 |       |       |       |                      |       |       |       | 144.6                  | 139.4 | 142.8 |      |
| 31                  | Title | 0.0060              |                 |       |       |       |                      |       |       |       | 142.8                  |       |       |      |
| 32                  | Title | 0.0050              |                 |       |       |       |                      |       |       |       | 137.6                  | 123.7 | 130.6 |      |
| 33                  | Title | 0.0040              |                 |       |       |       |                      |       |       |       | 132.4                  | 115.0 | 123.7 |      |
| 34                  | Title | 0.0026              |                 |       |       |       |                      |       |       |       |                        | 101.0 | 106.3 |      |
| 35                  | Title | 0.0017              |                 |       |       |       |                      |       |       |       |                        | 85.4  | 87.1  |      |
| 36                  | Title | 0.0012              |                 |       |       |       |                      |       |       |       |                        | 76.6  | 80.1  |      |
| 37                  | Title | 0.0009              |                 |       |       |       |                      |       |       |       |                        | 66.2  | 67.9  |      |

Figure 6C – fit

| Nonlin fit<br>Table of results |                            | A                 | B                    | C                      |
|--------------------------------|----------------------------|-------------------|----------------------|------------------------|
|                                |                            | PI4P (μmol/min)   | PI(4,5)P2 (μmol/min) | PI(3,4,5)P3 (μmol/min) |
|                                |                            | Y                 | Y                    | Y                      |
| 1                              | <b>Michaelis-Menten</b>    |                   |                      |                        |
| 2                              | <b>Best-fit values</b>     |                   |                      |                        |
| 3                              | Vmax                       | 466.4             | 269.7                | 167.7                  |
| 4                              | Km                         | 0.07731           | 0.01834              | 0.001445               |
| 5                              | <b>Std. Error</b>          |                   |                      |                        |
| 6                              | Vmax                       | 126.5             | 27.55                | 2.423                  |
| 7                              | Km                         | 0.02527           | 0.003189             | 9.109e-005             |
| 8                              | <b>95% CI (asymptotic)</b> |                   |                      |                        |
| 9                              | Vmax                       | 210.2 to 722.5    | 213.5 to 325.9       | 162.7 to 172.7         |
| 10                             | Km                         | 0.02616 to 0.1285 | 0.01184 to 0.02485   | 0.001257 to 0.001633   |
| 11                             | <b>Goodness of Fit</b>     |                   |                      |                        |
| 12                             | Degrees of Freedom         | 38                | 31                   | 24                     |
| 13                             | R squared                  | 0.9596            | 0.9185               | 0.9693                 |
| 14                             | Sum of Squares             | 1592              | 3967                 | 715.3                  |
| 15                             | Sy.x                       | 6.473             | 11.31                | 5.459                  |
| 16                             | <b>Constraints</b>         |                   |                      |                        |
| 17                             | Km                         | Km > 0            | Km > 0               | Km > 0                 |
| 18                             |                            |                   |                      |                        |
| 19                             | <b>Number of points</b>    |                   |                      |                        |
| 20                             | # of X values              | 40                | 100                  | 148                    |
| 21                             | # Y values analyzed        | 40                | 33                   | 26                     |
