# Supplementary material for: Autoinhibition and regulation by phosphoinositides of ATP8B1, a human lipid flippase associated with intrahepatic cholestatic disorders
Source: eLife journal article supplement (doi:10.7554/elife.75272), 2022-04-13
Supplement: supp [file elife-75272-supp-v1.zip]

Figure 6B – source data

|  | Group A               | Group B               | Group C               | Group D | Group E | Group F | Group G | Group H                 |
|---------------------------------------------------------------------------------|-----------------------|-----------------------|-----------------------|---------|---------|---------|---------|-------------------------|
|                                                                                 | PI(4,5)P <sub>2</sub> | PI(3,5)P <sub>2</sub> | PI(3,4)P <sub>2</sub> | PI(5)P  | PI(4)P  | PI(3)P  | PI      | PI(3,4,5)P <sub>3</sub> |
|                                                                                 |                       |                       |                       |         |         |         |         |                         |
| 1                                                                               | 94.5                  | 88.6                  | 81.2                  | 35.7    | 38.8    | 33.3    | 4.5     | 145.9                   |
| 2                                                                               | 103.9                 | 72.5                  | 77.7                  | 37.0    | 39.8    | 36.4    | 8.2     | 155.8                   |
| 3                                                                               | 101.6                 | 86.7                  | 80.4                  | 36.6    | 44.0    | 34.2    | 6.9     | 142.4                   |
