# Supplementary material for: Autoinhibition and regulation by phosphoinositides of ATP8B1, a human lipid flippase associated with intrahepatic cholestatic disorders
Source: eLife journal article supplement (doi:10.7554/elife.75272), 2022-04-13
Supplement: supp [file elife-75272-supp-v1.zip]

# Figure 5E – source data

| Table format:<br>Grouped |                | Group A           |      |      | Group B  |      |      | Group C |      |      |
|--------------------------|----------------|-------------------|------|------|----------|------|------|---------|------|------|
|                          |                | ATP8B1/CDC50A dNC |      |      | Drs2 dNC |      |      | Na/K    |      |      |
|                          |                | A:Y1              | A:Y2 | A:Y3 | B:Y1     | B:Y2 | B:Y3 | C:Y1    | C:Y2 | C:Y3 |
| 1                        | -C-ter peptide | 100               | 100  | 100  | 98       | 99   | 103  | 106.7   | 97.8 | 95.4 |
| 2                        | +C-ter peptide | 10                |      |      | 100      | 77   | 83   | 85.9    | 85.5 | 90.1 |
| 3                        | Title          |                   |      |      |          |      |      |         |      |      |

# Figure 5E – statistics

ANOVA results × Multiple comparisons × Narrative results ×

| 2way ANOVA    |                                       |                             |                |                        |                     |                |
|---------------|---------------------------------------|-----------------------------|----------------|------------------------|---------------------|----------------|
| ANOVA results |                                       |                             |                |                        |                     |                |
| 1             | Table Analyzed                        | % of control, grouped       |                |                        |                     |                |
| 2             |                                       |                             |                |                        |                     |                |
| 3             | <b>Two-way ANOVA</b>                  | Ordinary                    |                |                        |                     |                |
| 4             | Alpha                                 | 0.05                        |                |                        |                     |                |
| 5             |                                       |                             |                |                        |                     |                |
| 6             | <b>Source of Variation</b>            | <b>% of total variation</b> | <b>P value</b> | <b>P value summary</b> | <b>Significant?</b> |                |
| 7             | Interaction                           | 45.92                       | <0.0001        | ****                   | Yes                 |                |
| 8             | C-ter peptide                         | 65.40                       | <0.0001        | ****                   | Yes                 |                |
| 9             | Protein type                          | 45.88                       | <0.0001        | ****                   | Yes                 |                |
| 10            |                                       |                             |                |                        |                     |                |
| 11            | <b>ANOVA table</b>                    | <b>SS (Type III)</b>        | <b>DF</b>      | <b>MS</b>              | <b>F (DFn, DFd)</b> | <b>P value</b> |
| 12            | Interaction                           | 3551                        | 2              | 1776                   | F (2, 10) = 46.42   | P<0.0001       |
| 13            | C-ter peptide                         | 5058                        | 1              | 5058                   | F (1, 10) = 132.2   | P<0.0001       |
| 14            | Protein type                          | 3548                        | 2              | 1774                   | F (2, 10) = 46.38   | P<0.0001       |
| 15            | Residual                              | 382.5                       | 10             | 38.25                  |                     |                |
| 16            |                                       |                             |                |                        |                     |                |
| 17            | <b>Difference between row means</b>   |                             |                |                        |                     |                |
| 18            | Predicted (LS) mean of -C-ter peptide | 99.99                       |                |                        |                     |                |
| 19            | Predicted (LS) mean of +C-ter peptide | 61.28                       |                |                        |                     |                |
| 20            | Difference between predicted means    | 38.71                       |                |                        |                     |                |
| 21            | SE of difference                      | 3.367                       |                |                        |                     |                |
| 22            | 95% CI of difference                  | 31.21 to 46.21              |                |                        |                     |                |
| 23            |                                       |                             |                |                        |                     |                |
| 24            | <b>Data summary</b>                   |                             |                |                        |                     |                |
| 25            | Number of columns (Protein type)      | 3                           |                |                        |                     |                |
| 26            | Number of rows (C-ter peptide)        | 2                           |                |                        |                     |                |
| 27            | Number of values                      | 16                          |                |                        |                     |                |
| 28            |                                       |                             |                |                        |                     |                |
