# Supplementary material for: Autoinhibition and regulation by phosphoinositides of ATP8B1, a human lipid flippase associated with intrahepatic cholestatic disorders
Source: eLife journal article supplement (doi:10.7554/elife.75272), 2022-04-13
Supplement: supp [file elife-75272-supp-v1.zip]

# Figure 4 – figure supplement 3B – source data

| Table format:<br>Grouped |            | Group A |       |       |       |       |       |       |       |       |       |       | D454N |       |       |       |
|--------------------------|------------|---------|-------|-------|-------|-------|-------|-------|-------|-------|-------|-------|-------|-------|-------|-------|
|                          |            | WT      |       |       |       |       |       |       |       |       |       |       |       |       |       |       |
|                          |            | A:Y1    | A:Y2  | A:Y3  | A:Y4  | A:Y5  | A:Y6  | A:Y7  | A:Y8  | A:Y9  | A:Y10 | A:Y11 | A:Y12 | B:Y1  | B:Y2  | B:Y3  |
| 1                        | DDM/CHS    | 0.154   | 0.152 | 0.157 | 0.125 | 0.119 | 0.127 | 0.114 | 0.113 | 0.110 | 0.101 | 0.107 | 0.113 | 0.195 | 0.146 | 0.182 |
| 2                        | +POPC      | 0.176   | 0.171 | 0.161 |       |       |       |       |       |       |       |       |       | 0.202 | 0.194 | 0.176 |
| 3                        | +PI(4,5)P2 | 0.126   | 0.121 | 0.116 |       |       |       |       |       |       |       |       |       | 0.135 | 0.115 | 0.122 |
| 4                        | +trypsin   | 0.784   | 0.743 | 0.758 | 0.770 | 0.750 | 0.758 | 0.697 | 0.707 | 0.666 | 0.584 | 0.508 | 0.509 | 0.143 | 0.142 | 0.126 |
| 5                        | +BeFx      | 0.147   | 0.145 | 0.152 | 0.157 | 0.137 | 0.149 | 0.134 | 0.119 | 0.151 | 0.150 | 0.156 | 0.134 | 0.149 | 0.120 | 0.115 |
