# Supplementary material for: Autoinhibition and regulation by phosphoinositides of ATP8B1, a human lipid flippase associated with intrahepatic cholestatic disorders
Source: eLife journal article supplement (doi:10.7554/elife.75272), 2022-04-13
Supplement: supp [file elife-75272-supp-v1.zip]

Figure 6A – tabular results – SM vs PC

| Unpaired t test<br>Tabular results |                                        |                                         |
|------------------------------------|----------------------------------------|-----------------------------------------|
| 1                                  | Table Analyzed                         | screen lipids + drugs_for new figure 5A |
| 2                                  |                                        |                                         |
| 3                                  | Column H                               | SM                                      |
| 4                                  | vs.                                    | vs.                                     |
| 5                                  | Column A                               | PC                                      |
| 6                                  |                                        |                                         |
| 7                                  | <b>Unpaired t test</b>                 |                                         |
| 8                                  | P value                                | <0.0001                                 |
| 9                                  | P value summary                        | ****                                    |
| 10                                 | Significantly different (P < 0.05)?    | Yes                                     |
| 11                                 | One- or two-tailed P value?            | Two-tailed                              |
| 12                                 | t, df                                  | t=30.03, df=4                           |
| 13                                 |                                        |                                         |
| 14                                 | <b>How big is the difference?</b>      |                                         |
| 15                                 | Mean of column A                       | 100.0                                   |
| 16                                 | Mean of column H                       | 11.30                                   |
| 17                                 | Difference between means (H - A) ± SEM | -88.70 ± 2.954                          |
| 18                                 | 95% confidence interval                | -96.90 to -80.50                        |
| 19                                 | R squared (eta squared)                | 0.9956                                  |
| 20                                 |                                        |                                         |
| 21                                 | <b>F test to compare variances</b>     |                                         |
| 22                                 | F, DFn, Dfd                            | 11.06, 2, 2                             |
| 23                                 | P value                                | 0.1658                                  |
| 24                                 | P value summary                        | ns                                      |
| 25                                 | Significantly different (P < 0.05)?    | No                                      |
| 26                                 |                                        |                                         |
| 27                                 | <b>Data analyzed</b>                   |                                         |
| 28                                 | Sample size, column A                  | 3                                       |
| 29                                 | Sample size, column H                  | 3                                       |

Figure 6A – descriptive statistics – SM vs PC

| Unpaired t test<br>Descriptive statistics |                    |       |        |
|-------------------------------------------|--------------------|-------|--------|
|                                           |                    | PC    | SM     |
|                                           |                    |       |        |
| 1                                         | Number of values   | 3     | 3      |
| 2                                         |                    |       |        |
| 3                                         | Minimum            | 94.50 | 10.00  |
| 4                                         | 25% Percentile     | 94.50 | 10.00  |
| 5                                         | Median             | 101.6 | 11.00  |
| 6                                         | 75% Percentile     | 103.9 | 12.90  |
| 7                                         | Maximum            | 103.9 | 12.90  |
| 8                                         |                    |       |        |
| 9                                         | Mean               | 100.0 | 11.30  |
| 10                                        | Std. Deviation     | 4.900 | 1.473  |
| 11                                        | Std. Error of Mean | 2.829 | 0.8505 |
| 12                                        |                    |       |        |
| 13                                        | Lower 95% CI       | 87.83 | 7.641  |
| 14                                        | Upper 95% CI       | 112.2 | 14.96  |

Figure 6A – tabular results – SM vs PE

| Unpaired t test<br>Tabular results |                                        |                                         |
|------------------------------------|----------------------------------------|-----------------------------------------|
| 1                                  | Table Analyzed                         | screen lipids + drugs_for new figure 5A |
| 2                                  |                                        |                                         |
| 3                                  | Column H                               | SM                                      |
| 4                                  | vs.                                    | vs.                                     |
| 5                                  | Column C                               | PE                                      |
| 6                                  |                                        |                                         |
| 7                                  | <b>Unpaired t test</b>                 |                                         |
| 8                                  | P value                                | <0.0001                                 |
| 9                                  | P value summary                        | ****                                    |
| 10                                 | Significantly different (P < 0.05)?    | Yes                                     |
| 11                                 | One- or two-tailed P value?            | Two-tailed                              |
| 12                                 | t, df                                  | t=48.46, df=4                           |
| 13                                 |                                        |                                         |
| 14                                 | <b>How big is the difference?</b>      |                                         |
| 15                                 | Mean of column C                       | 141.2                                   |
| 16                                 | Mean of column H                       | 11.30                                   |
| 17                                 | Difference between means (H - C) ± SEM | -129.9 ± 2.681                          |
| 18                                 | 95% confidence interval                | -137.3 to -122.5                        |
| 19                                 | R squared (eta squared)                | 0.9983                                  |
| 20                                 |                                        |                                         |
| 21                                 | <b>F test to compare variances</b>     |                                         |
| 22                                 | F, DFn, Dfd                            | 8.935, 2, 2                             |
| 23                                 | P value                                | 0.2013                                  |
| 24                                 | P value summary                        | ns                                      |
| 25                                 | Significantly different (P < 0.05)?    | No                                      |
| 26                                 |                                        |                                         |
| 27                                 | <b>Data analyzed</b>                   |                                         |
| 28                                 | Sample size, column C                  | 3                                       |
| 29                                 | Sample size, column H                  | 3                                       |

Figure 6A – descriptive statistics – SM vs PE

| Tabular results<br>Descriptive statistics |                    | Impaired t test |        |
|-------------------------------------------|--------------------|-----------------|--------|
|                                           |                    | PE              | SM     |
| 1                                         | Number of values   | 3               | 3      |
| 2                                         |                    |                 |        |
| 3                                         | Minimum            | 136.2           | 10.00  |
| 4                                         | 25% Percentile     | 136.2           | 10.00  |
| 5                                         | Median             | 142.9           | 11.00  |
| 6                                         | 75% Percentile     | 144.5           | 12.90  |
| 7                                         | Maximum            | 144.5           | 12.90  |
| 8                                         |                    |                 |        |
| 9                                         | Mean               | 141.2           | 11.30  |
| 10                                        | Std. Deviation     | 4.403           | 1.473  |
| 11                                        | Std. Error of Mean | 2.542           | 0.8505 |
| 12                                        |                    |                 |        |
| 13                                        | Lower 95% CI       | 130.3           | 7.641  |
| 14                                        | Upper 95% CI       | 152.1           | 14.96  |

Figure 6A – tabular results – SM vs PS

| Unpaired t test<br>Tabular results |                                        |                                         |
|------------------------------------|----------------------------------------|-----------------------------------------|
| 1                                  | Table Analyzed                         | screen lipids + drugs_for new figure 5A |
| 2                                  |                                        |                                         |
| 3                                  | Column H                               | SM                                      |
| 4                                  | vs.                                    | vs.                                     |
| 5                                  | Column B                               | PS                                      |
| 6                                  |                                        |                                         |
| 7                                  | <b>Unpaired t test</b>                 |                                         |
| 8                                  | P value                                | <0.0001                                 |
| 9                                  | P value summary                        | ****                                    |
| 10                                 | Significantly different (P < 0.05)?    | Yes                                     |
| 11                                 | One- or two-tailed P value?            | Two-tailed                              |
| 12                                 | t, df                                  | t=37.54, df=4                           |
| 13                                 |                                        |                                         |
| 14                                 | <b>How big is the difference?</b>      |                                         |
| 15                                 | Mean of column B                       | 49.23                                   |
| 16                                 | Mean of column H                       | 11.30                                   |
| 17                                 | Difference between means (H - B) ± SEM | -37.93 ± 1.011                          |
| 18                                 | 95% confidence interval                | -40.74 to -35.13                        |
| 19                                 | R squared (eta squared)                | 0.9972                                  |
| 20                                 |                                        |                                         |
| 21                                 | <b>F test to compare variances</b>     |                                         |
| 22                                 | F, DFn, Dfd                            | 2.429, 2, 2                             |
| 23                                 | P value                                | 0.5832                                  |
| 24                                 | P value summary                        | ns                                      |
| 25                                 | Significantly different (P < 0.05)?    | No                                      |
| 26                                 |                                        |                                         |
| 27                                 | <b>Data analyzed</b>                   |                                         |
| 28                                 | Sample size, column B                  | 3                                       |
| 29                                 | Sample size, column H                  | 3                                       |

Figure 6A – descriptive statistics – SM vs PS

| Unpaired t test<br>Descriptive statistics |                    | PS     | SM     |
|-------------------------------------------|--------------------|--------|--------|
| 1                                         | Number of values   | 3      | 3      |
| 2                                         |                    |        |        |
| 3                                         | Minimum            | 48.50  | 10.00  |
| 4                                         | 25% Percentile     | 48.50  | 10.00  |
| 5                                         | Median             | 48.90  | 11.00  |
| 6                                         | 75% Percentile     | 50.30  | 12.90  |
| 7                                         | Maximum            | 50.30  | 12.90  |
| 8                                         |                    |        |        |
| 9                                         | Mean               | 49.23  | 11.30  |
| 10                                        | Std. Deviation     | 0.9452 | 1.473  |
| 11                                        | Std. Error of Mean | 0.5457 | 0.8505 |
| 12                                        |                    |        |        |
| 13                                        | Lower 95% CI       | 46.89  | 7.641  |
| 14                                        | Upper 95% CI       | 51.58  | 14.96  |

Figure 6A – tabular results – SM vs CL

| Unpaired t test<br>Tabular results |                                        |                                         |
|------------------------------------|----------------------------------------|-----------------------------------------|
| 1                                  | Table Analyzed                         | screen lipids + drugs_for new figure 5A |
| 2                                  |                                        |                                         |
| 3                                  | Column H                               | SM                                      |
| 4                                  | vs.                                    | vs.                                     |
| 5                                  | Column G                               | CL                                      |
| 6                                  |                                        |                                         |
| 7                                  | <b>Unpaired t test</b>                 |                                         |
| 8                                  | P value                                | 0.5756                                  |
| 9                                  | P value summary                        | ns                                      |
| 10                                 | Significantly different (P < 0.05)?    | No                                      |
| 11                                 | One- or two-tailed P value?            | Two-tailed                              |
| 12                                 | t, df                                  | t=0.6086, df=4                          |
| 13                                 |                                        |                                         |
| 14                                 | <b>How big is the difference?</b>      |                                         |
| 15                                 | Mean of column G                       | 10.40                                   |
| 16                                 | Mean of column H                       | 11.30                                   |
| 17                                 | Difference between means (H - G) ± SEM | 0.9000 ± 1.479                          |
| 18                                 | 95% confidence interval                | -3.206 to 5.006                         |
| 19                                 | R squared (eta squared)                | 0.08476                                 |
| 20                                 |                                        |                                         |
| 21                                 | <b>F test to compare variances</b>     |                                         |
| 22                                 | F, DFn, Dfd                            | 2.023, 2, 2                             |
| 23                                 | P value                                | 0.6616                                  |
| 24                                 | P value summary                        | ns                                      |
| 25                                 | Significantly different (P < 0.05)?    | No                                      |
| 26                                 |                                        |                                         |
| 27                                 | <b>Data analyzed</b>                   |                                         |
| 28                                 | Sample size, column G                  | 3                                       |
| 29                                 | Sample size, column H                  | 3                                       |



Figure 6A – descriptive statistics – SM vs CL

| Unpaired t test<br>Descriptive statistics |                    | CL    | SM     |
|-------------------------------------------|--------------------|-------|--------|
|                                           |                    |       |        |
| 1                                         | Number of values   | 3     | 3      |
| 2                                         |                    |       |        |
| 3                                         | Minimum            | 8.600 | 10.00  |
| 4                                         | 25% Percentile     | 8.600 | 10.00  |
| 5                                         | Median             | 9.900 | 11.00  |
| 6                                         | 75% Percentile     | 12.70 | 12.90  |
| 7                                         | Maximum            | 12.70 | 12.90  |
| 8                                         |                    |       |        |
| 9                                         | Mean               | 10.40 | 11.30  |
| 10                                        | Std. Deviation     | 2.095 | 1.473  |
| 11                                        | Std. Error of Mean | 1.210 | 0.8505 |
| 12                                        |                    |       |        |
| 13                                        | Lower 95% CI       | 5.195 | 7.641  |
| 14                                        | Upper 95% CI       | 15.60 | 14.96  |

Figure 6A – tabular results – SM vs Lyso-PC

| Unpaired t test |                                        |                  |
|-----------------|----------------------------------------|------------------|
| 1               | Table Analyzed                         | screen drugs     |
| 2               |                                        |                  |
| 3               | Column E                               | SM               |
| 4               | vs.                                    | vs.              |
| 5               | Column B                               | Lyso-PC          |
| 6               |                                        |                  |
| 7               | <b>Unpaired t test</b>                 |                  |
| 8               | P value                                | 0.0002           |
| 9               | P value summary                        | ***              |
| 10              | Significantly different (P < 0.05)?    | Yes              |
| 11              | One- or two-tailed P value?            | Two-tailed       |
| 12              | t, df                                  | t=13.72, df=4    |
| 13              |                                        |                  |
| 14              | <b>How big is the difference?</b>      |                  |
| 15              | Mean of column B                       | 36.40            |
| 16              | Mean of column E                       | 11.30            |
| 17              | Difference between means (E - B) ± SEM | -25.10 ± 1.829   |
| 18              | 95% confidence interval                | -30.18 to -20.02 |
| 19              | R squared (eta squared)                | 0.9792           |
| 20              |                                        |                  |
| 21              | <b>F test to compare variances</b>     |                  |
| 22              | F, DFn, Dfd                            | 3.627, 2, 2      |
| 23              | P value                                | 0.4323           |
| 24              | P value summary                        | ns               |
| 25              | Significantly different (P < 0.05)?    | No               |

Figure 6A – tabular results – SM vs edelfosine

| Unpaired t test |                                        |                  |
|-----------------|----------------------------------------|------------------|
| 1               | Table Analyzed                         | screen drugs     |
| 2               |                                        |                  |
| 3               | Column E                               | SM               |
| 4               | vs.                                    | vs.              |
| 5               | Column C                               | Edelfosine       |
| 6               |                                        |                  |
| 7               | <b>Unpaired t test</b>                 |                  |
| 8               | P value                                | 0.0071           |
| 9               | P value summary                        | **               |
| 10              | Significantly different (P < 0.05)?    | Yes              |
| 11              | One- or two-tailed P value?            | Two-tailed       |
| 12              | t, df                                  | t=5.068, df=4    |
| 13              |                                        |                  |
| 14              | <b>How big is the difference?</b>      |                  |
| 15              | Mean of column C                       | 21.77            |
| 16              | Mean of column E                       | 11.30            |
| 17              | Difference between means (E - C) ± SEM | -10.47 ± 2.065   |
| 18              | 95% confidence interval                | -16.20 to -4.733 |
| 19              | R squared (eta squared)                | 0.8653           |
| 20              |                                        |                  |
| 21              | <b>F test to compare variances</b>     |                  |
| 22              | F, DFn, Dfd                            | 4.896, 2, 2      |
| 23              | P value                                | 0.3392           |
| 24              | P value summary                        | ns               |
| 25              | Significantly different (P < 0.05)?    | No               |

Figure 6A – tabular results – SM vs miltefosine

| Unpaired t test |                                        |                  |
|-----------------|----------------------------------------|------------------|
| 1               | Table Analyzed                         | screen drugs     |
| 2               |                                        |                  |
| 3               | Column E                               | SM               |
| 4               | vs.                                    | vs.              |
| 5               | Column D                               | Miltefosine      |
| 6               |                                        |                  |
| 7               | <b>Unpaired t test</b>                 |                  |
| 8               | P value                                | 0.0177           |
| 9               | P value summary                        | *                |
| 10              | Significantly different (P < 0.05)?    | Yes              |
| 11              | One- or two-tailed P value?            | Two-tailed       |
| 12              | t, df                                  | t=3.887, df=4    |
| 13              |                                        |                  |
| 14              | <b>How big is the difference?</b>      |                  |
| 15              | Mean of column D                       | 19.33            |
| 16              | Mean of column E                       | 11.30            |
| 17              | Difference between means (E - D) ± SEM | -8.033 ± 2.067   |
| 18              | 95% confidence interval                | -13.77 to -2.295 |
| 19              | R squared (eta squared)                | 0.7907           |
| 20              |                                        |                  |
| 21              | <b>F test to compare variances</b>     |                  |
| 22              | F, DFn, Dfd                            | 4.905, 2, 2      |
| 23              | P value                                | 0.3387           |
| 24              | P value summary                        | ns               |
| 25              | Significantly different (P < 0.05)?    | No               |
