# Supplementary material for: Autoinhibition and regulation by phosphoinositides of ATP8B1, a human lipid flippase associated with intrahepatic cholestatic disorders
Source: eLife journal article supplement (doi:10.7554/elife.75272), 2022-04-13
Supplement: supp [file elife-75272-supp-v1.zip]

Figure 1 – figure supplement 1E – source data

| Table format:<br>Grouped |        | Group A                       |       |
|--------------------------|--------|-------------------------------|-------|
|                          |        | normalized to the number of W |       |
|                          | ⊗      | A:Y1                          | A:Y2  |
| 1                        | ATP8B1 | 0.387                         | 0.362 |
| 2                        | CDC50A | 0.343                         | 0.420 |
| 3                        | Title  |                               |       |
