# Supplementary material for: Autoinhibition and regulation by phosphoinositides of ATP8B1, a human lipid flippase associated with intrahepatic cholestatic disorders
Source: eLife journal article supplement (doi:10.7554/elife.75272), 2022-04-13
Supplement: supp [file elife-75272-supp-v1.zip]

## Figure 6D – source data – Vm

| Table format:<br>Grouped |    | Group A |       |    | Group B               |        |    | Group C                 |       |    |
|--------------------------|----|---------|-------|----|-----------------------|--------|----|-------------------------|-------|----|
|                          |    | PI(4)P  |       |    | PI(4,5)P <sub>2</sub> |        |    | PI(3,4,5)P <sub>3</sub> |       |    |
|                          | ⊗  | Mean    | SD    | N  | Mean                  | SD     | N  | Mean                    | SD    | N  |
| 1                        | Vm | 1.000   | 0.070 | 36 | 1.160                 | 0.1080 | 33 | 0.78                    | 0.023 | 26 |

## Figure 6D – source data – Km

| Table format:<br>Grouped |    | Group A |       |    | Group B               |        |    | Group C                 |         |    |
|--------------------------|----|---------|-------|----|-----------------------|--------|----|-------------------------|---------|----|
|                          |    | PI(4)P  |       |    | PI(4,5)P <sub>2</sub> |        |    | PI(3,4,5)P <sub>3</sub> |         |    |
|                          | ⊗  | Mean    | SD    | N  | Mean                  | SD     | N  | Mean                    | SD      | N  |
| 1                        | Km | 1.000   | 0.070 | 36 | 1.820                 | 0.1700 | 33 | 21.70000                | 0.65000 | 26 |
