# Supplementary material for: Autoinhibition and regulation by phosphoinositides of ATP8B1, a human lipid flippase associated with intrahepatic cholestatic disorders
Source: eLife journal article supplement (doi:10.7554/elife.75272), 2022-04-13
Supplement: supp [file elife-75272-supp-v1.zip]

Figure 5B – source data 1

|                        |       | X               | Group A |      |      | Group B              |      |      |
|------------------------|-------|-----------------|---------|------|------|----------------------|------|------|
|                        |       | log[peptide], M | C-ter   |      |      | Phosphorylated C-ter |      |      |
|                        | ⊗     | X               | A:Y1    | A:Y2 | A:Y3 | B:Y1                 | B:Y2 | B:Y3 |
| 1                      | Title | -9.0000         | 96      | 101  | 99   | 104                  | 98   | 99   |
| 2                      | Title | -8.5200         | 101     | 107  | 96   | 99                   | 103  | 97   |
| 3                      | Title | -8.0000         | 98      | 97   | 96   | 109                  | 96   | 100  |
| 4                      | Title | -7.5300         | 103     | 101  | 98   | 100                  | 103  | 110  |
| 5                      | Title | -7.0000         | 104     | 104  | 97   | 94                   | 99   | 104  |
| OK CM210518_other fits |       | -6.5300         | 103     | 99   | 97   | 106                  | 102  | 110  |
| 7                      | Title | -6.0110         | 103     | 95   | 99   | 107                  | 102  | 112  |
| 8                      | Title | -5.5400         | 94      | 86   | 87   | 105                  | 101  | 116  |
| 9                      | Title | -5.0200         | 74      | 63   | 69   | 108                  | 100  | 108  |
| 10                     | Title | -4.5400         | 47      | 42   | 40   | 108                  | 99   | 109  |
| 11                     | Title | -4.0400         |         | 21   | 22   | 94                   | 82   | 100  |
| 12                     | Title | -3.7400         |         |      | 10   |                      | 76   | 87   |
| 13                     | Title |                 |         |      |      |                      |      |      |

Figure 5B – fit

| Nonlin fit |                                                          | A                        | B                     |
|------------|----------------------------------------------------------|--------------------------|-----------------------|
|            |                                                          | C-ter                    | Phosphorylated C-ter  |
|            |                                                          | Y                        | Y                     |
| 1          | log(inhibitor) vs. normalized response -- Variable slope |                          |                       |
| 2          | Best-fit values                                          |                          |                       |
| 3          | LogIC50                                                  | -4.655                   | -3.423                |
| 4          | HillSlope                                                | -1.013                   | -1.965                |
| 5          | IC50                                                     | 2.213e-005               | 0.0003774             |
| 6          | Std. Error                                               |                          |                       |
| 7          | LogIC50                                                  | 0.02429                  | 0.2058                |
| 8          | HillSlope                                                | 0.05552                  | 1.057                 |
| 9          | 95% Confidence Intervals                                 |                          |                       |
| 10         | LogIC50                                                  | -4.704 to -4.605         | -3.842 to -3.005      |
| 11         | HillSlope                                                | -1.126 to -0.8996        | -4.116 to 0.1858      |
| 12         | IC50                                                     | 1.975e-005 to 2.481e-005 | 0.0001439 to 0.000989 |
| 13         | Goodness of Fit                                          |                          |                       |
| 14         | Degrees of Freedom                                       | 31                       | 33                    |
| 15         | R square                                                 | 0.9839                   | 0.3462                |
| 16         | Absolute Sum of Squares                                  | 396.1                    | 1461                  |
| 17         | Sy.x                                                     | 3.575                    | 6.653                 |
| 18         |                                                          |                          |                       |
| 19         | Number of points                                         |                          |                       |
| 20         | Analyzed                                                 | 33                       | 35                    |
| 21         |                                                          |                          |                       |
