# Supplementary figures and images for: Autoinhibition and regulation by phosphoinositides of ATP8B1, a human lipid flippase associated with intrahepatic cholestatic disorders
Source: eLife journal article supplement (doi:10.7554/elife.75272), 2022-04-13

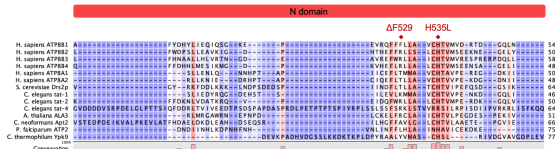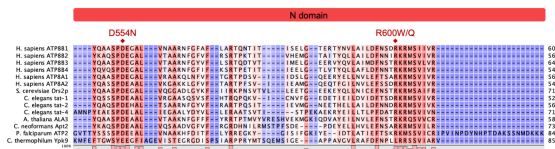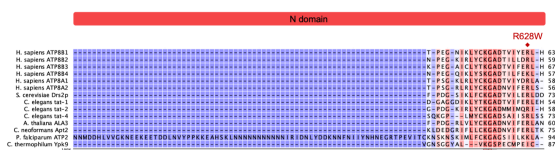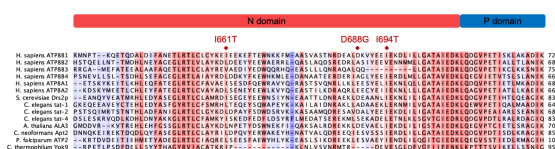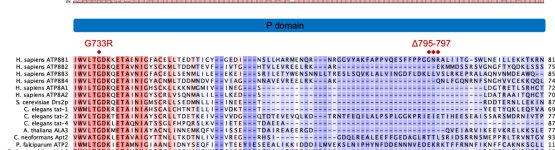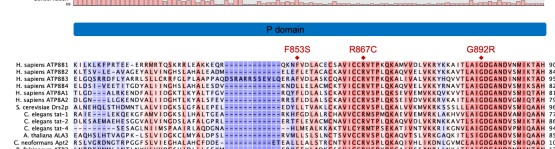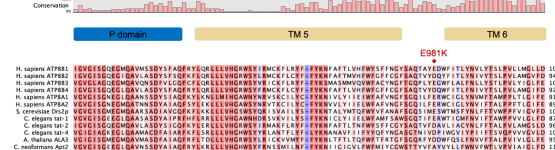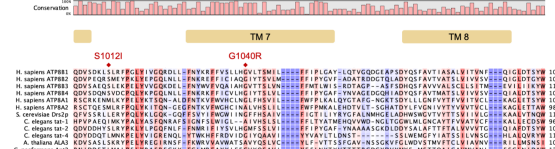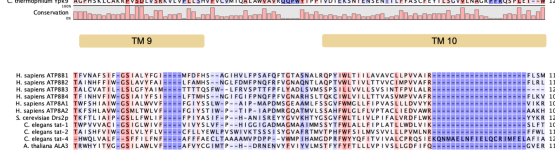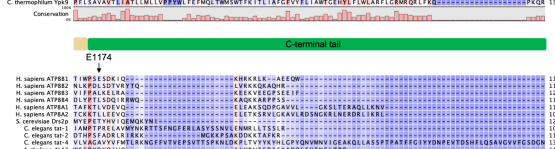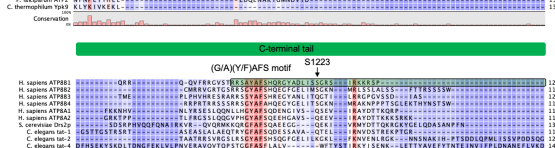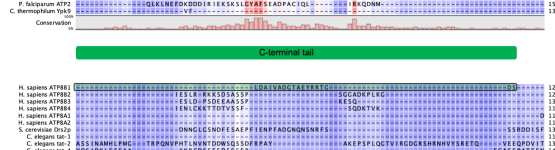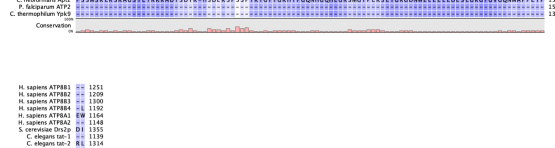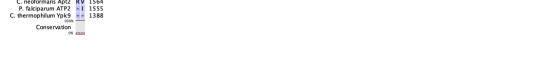

Supplement: supp [file elife-75272-supp-v1.zip]
